# Supplementary material
Source: PubMed Central journal article supplement (PMC4056269)
Supplement: supp_114.214189_jpet214189_suppl_fig_1.pdf [file supp_114.214189_jpet214189_suppl_fig_1.pdf]

Trovafloxacin enhances LPS-stimulated production of TNF by macrophages: role of the DNA damage response.

Kyle L. Poulsen, Jesus Olivero Verbel, Kevin M. Beggs, Patricia E. Ganey and Robert A. Roth

The Journal of Pharmacology and Experimental Therapeutics

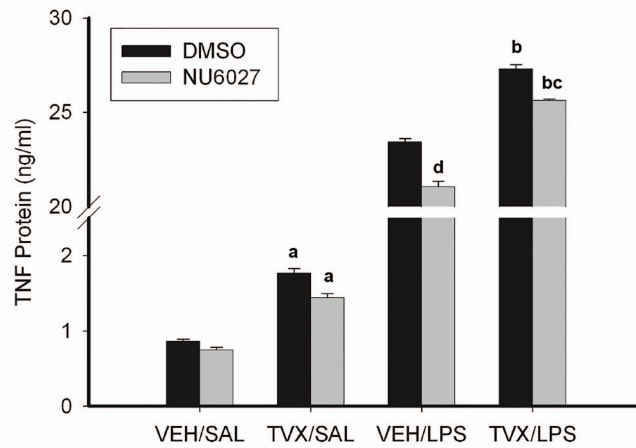

**Supplemental Figure 1. Effect of ATR inhibitor NU6027 added at the time of LPS addition on TNF release.** RAW cells were pretreated with VEH or TVX (100  $\mu$ M) for 2 hours, after which time medium was replaced with one containing SAL or LPS (10 ng/ml) and NU6027 (10  $\mu$ M) or its DMSO (0.05%) vehicle. Values are means  $\pm$  SEM, n=3. a – Significantly different from VEH/SAL,  $p < 0.05$ , b – Significantly different from VEH/LPS with same inhibitor treatment,  $p < 0.05$ , c – Significantly different from TVX/LPS/DMSO group,  $p < 0.05$ , d – Significantly different from VEH/LPS/DMSO group,  $p < 0.05$ .
